# Supplementary material
Source: PubMed Central journal article supplement (PMC3182834)

**A****TRAF binding site mutants of Act1****TB1:** 38-EEESE-42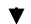

38-EAESE-42

**TB2:** 333-EERPA-337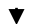

333-AERPA-337

**TB1+2 = TB1 + TB2**

IP: M2

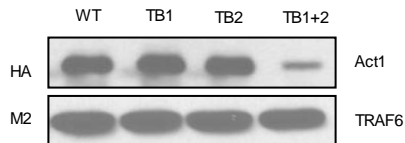

WCE

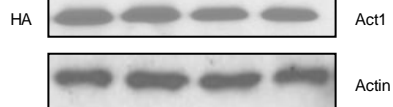**B**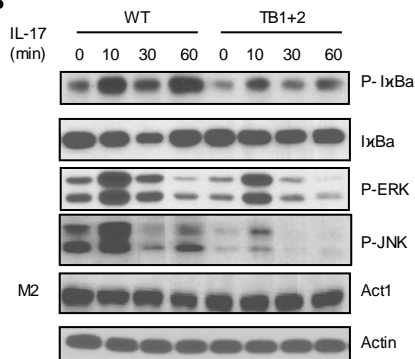**C**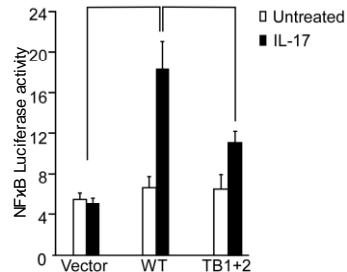**D**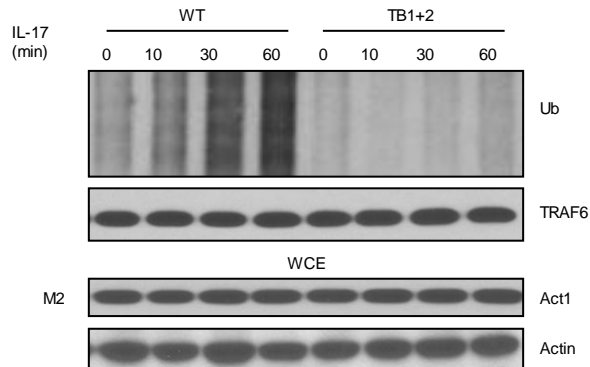

Supplement: NIHMS205445-supplement-sup.pdf [file NIHMS205445-supplement-sup.pdf]
